# Supplementary material
Source: Royal Society of Chemistry journal article supplement (doi:10.1039/d5cp04875c)
Supplement: d5cp04875c1.pdf [file d5cp04875c1.pdf]

*Supporting information for*

**Atomistic insights into confinement and electric potential  
effects on the Electric Double Layer of CO<sub>2</sub>/IL at slits**

Yiming Han (韩一鸣),<sup>1\*</sup> Xiang Wei(魏翔)<sup>2\*</sup>

<sup>1</sup>Key Laboratory of Energy Thermal Conversion and Control of Ministry of Education,  
School of Energy and Environment, Southeast University, Nanjing, China

<sup>2</sup>Hebei Key Laboratory of Low Carbon and High Efficiency Power Generation  
Technology, North China Electric Power University, Baoding, Hebei, China

Corresponding authors:

Yiming Han and Xiang Wei.

Email: hanyiming@seu.edu.cn(H. Yiming), xiangwei@ncepu.edu.cn(X. Wei).

Table S1 Detailed LJ interaction parameters for each atom in the CO<sub>2</sub>/IL.

| Molecule                       | Atom                | $\epsilon_0$ (kcal/mol) | $\sigma_0$ (Å) | Charge(e) |
|--------------------------------|---------------------|-------------------------|----------------|-----------|
| CO <sub>2</sub>                | C                   | 0.056                   | 2.757          | 0.7       |
|                                | O                   | 0.16                    | 3.033          | -0.35     |
| Bmim <sup>+</sup>              | C in Imidazole ring | 0.066                   | 3.5            | +0.131    |
|                                | N in Imidazole ring | 0.17                    | 3.25           | -0.347    |
|                                | H in Imidazole ring | 0.03                    | 2.5            | +0.186    |
|                                | C in Methyl         | 0.066                   | 3.5            | -0.043    |
|                                | H in Methyl         | 0.03                    | 2.5            | 0.09      |
|                                | C in Butyl chain    | 0.066                   | 3.5            | -0.043    |
|                                | H in Butyl chain    | 0.03                    | 2.5            | 0.09      |
| Tf <sub>2</sub> N <sup>-</sup> | O                   | 0.17                    | 2.96           | -0.53     |
|                                | S                   | 0.25                    | 3.55           | 1.02      |
|                                | N                   | 0.17                    | 3.25           | -0.53     |
|                                | C                   | 0.066                   | 3.5            | 0.35      |
|                                | F                   | 0.06                    | 2.9            | -0.16     |

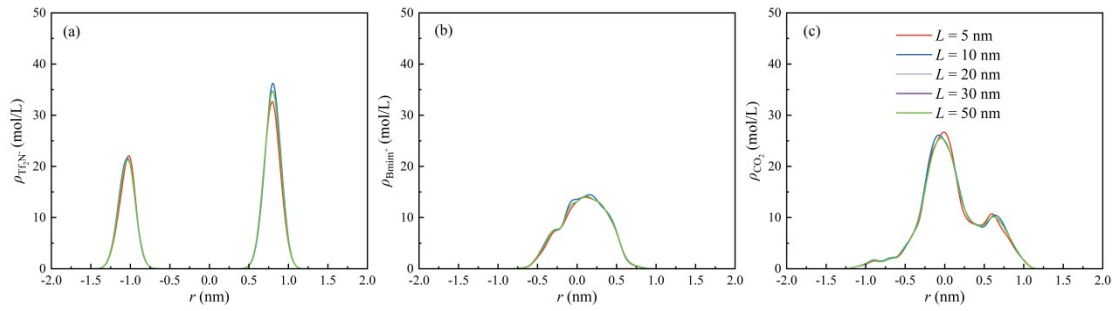

FIG: S1 The density distribution of (a) Tf<sub>2</sub>N<sup>-</sup>, (b) Bmim<sup>+</sup>, and (c) CO<sub>2</sub> along the  $r$  when  $\phi = -1.4$  V under different lengths of CNT at  $d = 0.8$  nm.

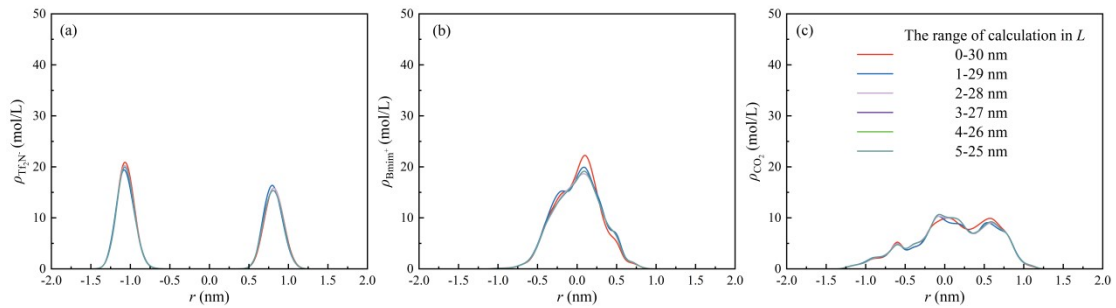

FIG: S2 The density distribution of (a) Tf<sub>2</sub>N<sup>-</sup>, (b) Bmim<sup>+</sup>, and (c) CO<sub>2</sub> along the  $r$  when  $\phi = 1.4$  V under different regions of slit at  $d = 0.8$  nm.

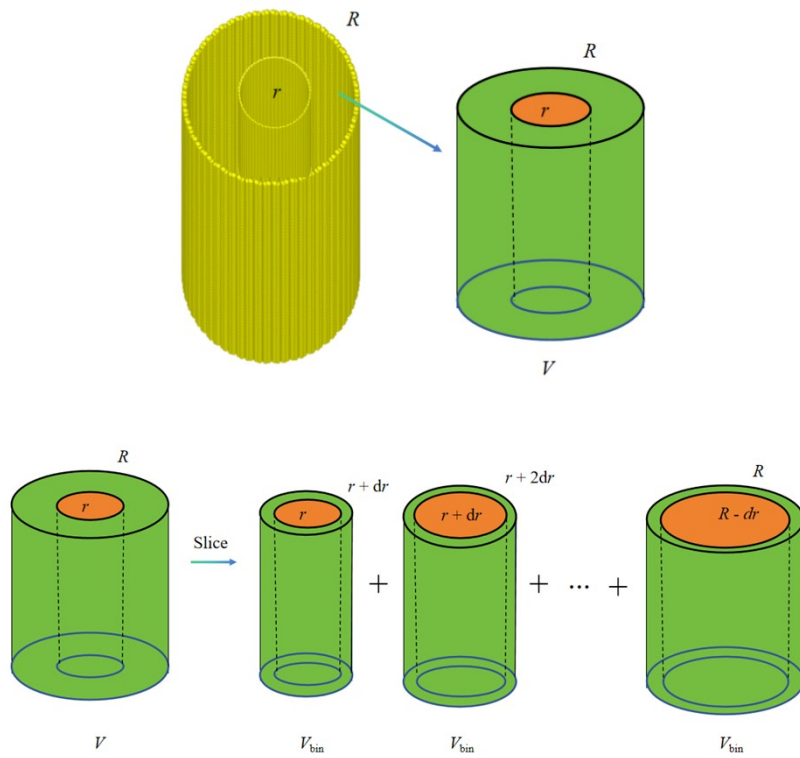

FIG: S3 Illustrations of the method of slice each layer inside the slit.
